# Supplementary material
Source: PubMed Central journal article supplement (PMC2845526)

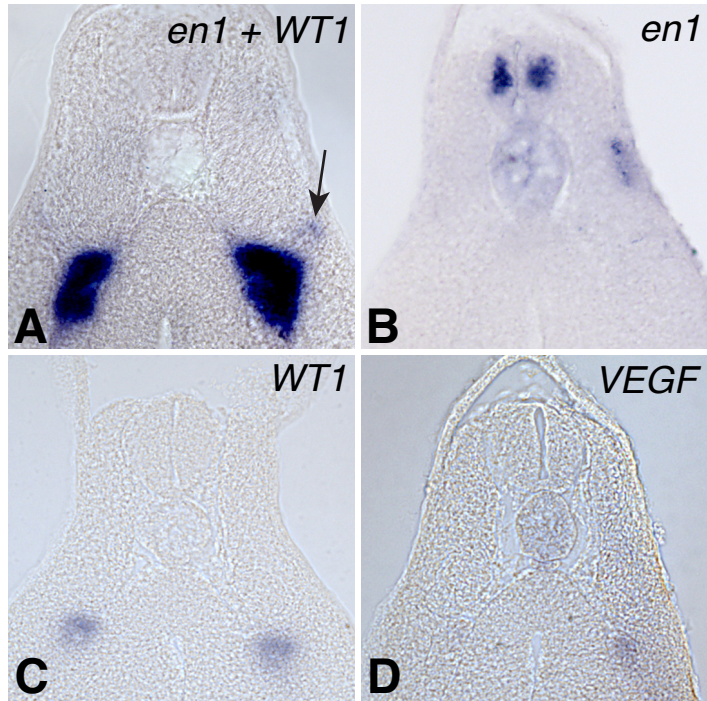

Figure S1 - Peyrot et al.

Supplement: NIHMS178439-supplement-01.pdf [file NIHMS178439-supplement-01.pdf]

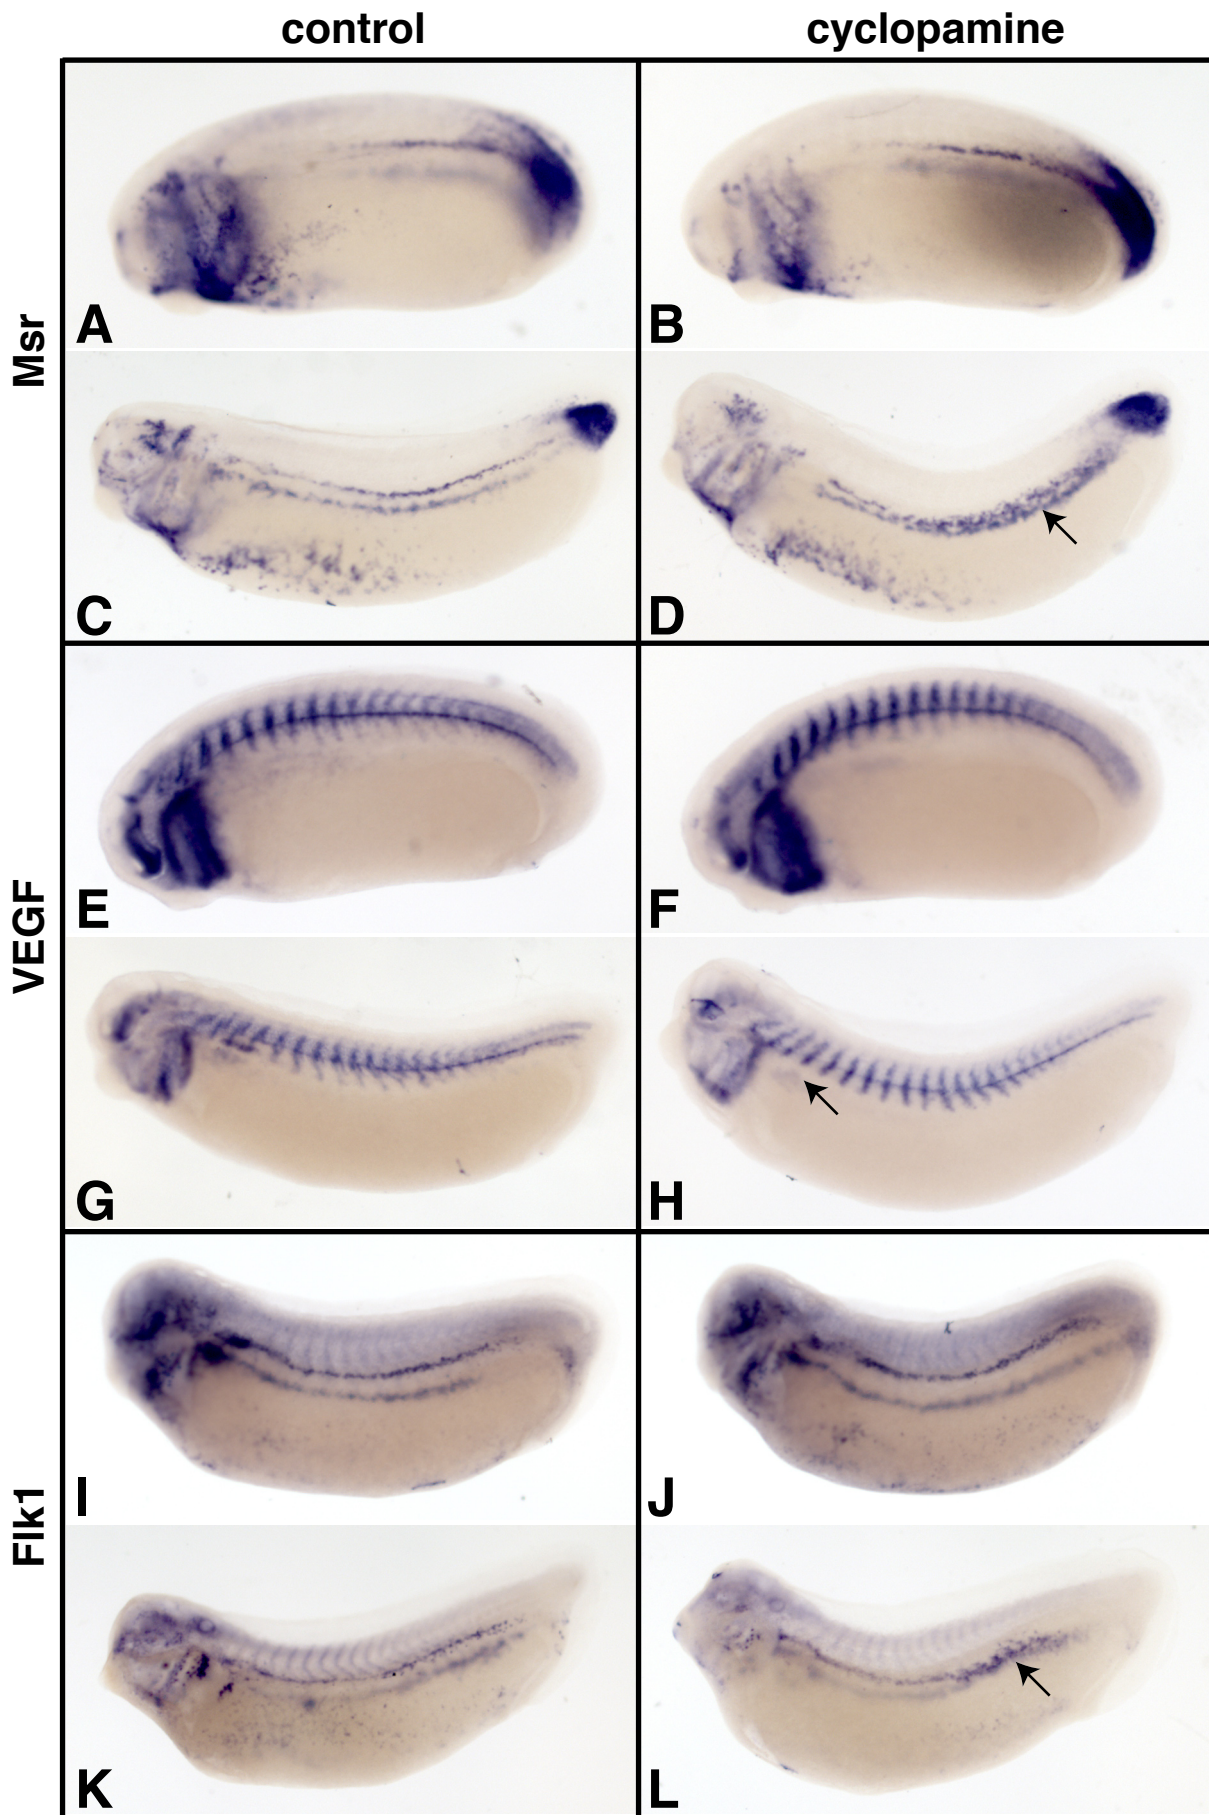

Figure S2 - Peyrot et al.

Supplement: NIHMS178439-supplement-02.pdf [file NIHMS178439-supplement-02.pdf]
